# Supplementary material for: Predicting drowning from sea and weather forecasts: development and validation of a model on surf beaches of southwestern France
Source: PubMed Central journal article supplement — Inj Prev. 2021 Mar 10;28(1):16–22. doi: 10.1136/injuryprev-2020-044092 (PMC8788255; doi:10.1136/injuryprev-2020-044092), 2021-03-10
Supplement: injuryprev-2020-044092supp001.pdf [file injuryprev-2020-044092supp001.pdf]

## Supplementary appendix

### A - Characteristics of the 3-hour period model of coast-wide life-risk prediction

**Table A1 Factors associated with water adverse events during 3-h periods.**

Univariate and multivariate analyses performed with the aid of logistic regression models for water adverse event risk along the Gironde coast during 3-h periods using retrospective data from 2011–2013. OR, odds ratio; CI, 95% confidence interval.

|                           | Crude OR (95% CI)  | Adj. OR (95% CI)   | $\chi^2$ |
|---------------------------|--------------------|--------------------|----------|
| Sea height, m             |                    |                    | 8.8      |
| $\geq 1.5$                | Ref.               | Ref.               |          |
| $< 1.5$                   | 1.66 (1.12, 2.43)  | 2.18 (1.33, 3.72)  |          |
| Wave factor, m $\times$ s |                    |                    | 22.1     |
| $\leq 4.7$                | Ref.               | Ref.               |          |
| 4.7–8                     | 3.12 (1.78, 6.13)  | 3.71 (2.00, 8.67)  |          |
| $> 8$                     | 2.14 (1.25, 4.31)  | 5.44 (2.74, 14.3)  |          |
| Wave incidence factor     | 1.98 (1.56, 2.66)  | 2.18 (1.56, 3.21)  | 15.9     |
| Air temperature, °C       |                    |                    | 50.7     |
| $\leq 20.5$               | Ref.               | Ref.               |          |
| 20.5–23                   | 7.48 (3.67, 20.6)  | 5.04 (2.35, 15.1)  |          |
| $> 23$                    | 24.99 (13.9, 66.7) | 15.11 (7.76, 48.0) |          |
| Water temperature, °C     |                    |                    |          |
| $\leq 19$                 | Ref.               |                    |          |
| $> 19$                    | 0.15 (0.08, 0.25)  |                    |          |
| Interval (local time)     |                    |                    | 31.3     |
| 9:30 am–12:29 pm          | Ref.               | Ref.               |          |
| 12:30 pm–3:29 pm          | 3.9 (2.10, 8.64)   | 2.87 (1.60, 6.69)  |          |
| 3:30 am–6:29 pm           | 5.10 (2.94, 11.8)  | 5.48 (2.95, 14.0)  |          |
| 6:30 am–9:30 pm           | 1.06 (0.44, 2.58)  | 1.45 (0.62, 3.95)  |          |
| Wind speed, m/ s          |                    |                    |          |
| $\leq 4.3$                | Ref.               |                    |          |
| 4.3–6.3                   | 1.30 (0.87, 2.00)  |                    |          |
| $> 6.3$                   | 0.97 (0.60, 1.54)  |                    |          |
| Season                    |                    |                    | 16.6     |
| Low                       | Ref.               | Ref.               |          |
| High                      | 8.71 (5.45, 17.2)  | 3.82 (2.09, 7.47)  |          |
| Type of day               |                    |                    | 17.9     |
| Weekday                   | Ref.               | Ref.               |          |
| Weekend                   | 1.90 (0.85, 3.97)  | 3.17 (1.35, 7.69)  |          |
| Vacation                  | 5.74 (3.64, 10.9)  | 3.62 (2.02, 7.80)  |          |

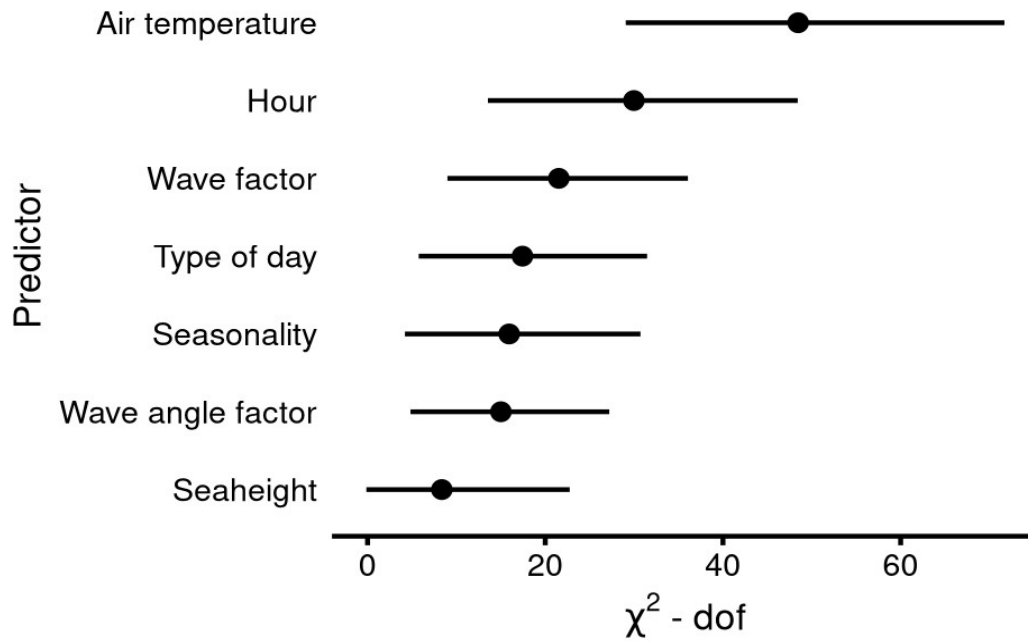

**Fig A1. Importance of predictors in coast-wide life-risk along Gironde surf beaches during 3-hour periods.** Importance of predictors is assessed using Wald statistics minus two degrees of freedom, their 95% confidence interval given by bootstrap estimations, multivariate logistic regression model.

**Table A2. Days with and without water adverse events according to the prediction delay and the risk levels.** Number of days with an event/number of days without any event, according to the coast-wide life-risk level prediction and the delay of forecasts, using daily risk model along Gironde surf beaches and data of years 2015-2017.

| Risk level | Delay  | Risk level prediction 3 days in advance |      |       |       |       |
|------------|--------|-----------------------------------------|------|-------|-------|-------|
|            |        | 1                                       | 2    | 3     | 4     | 5     |
| 1          | 1 day  | 1/140                                   | 0/11 | 0/3   | 0/1   | 0/0   |
|            | 2 days | 1/152                                   | 0/10 | 0/2   | 0/0   | 0/0   |
| 2          | 1 day  | 0/21                                    | 6/79 | 2/10  | 0/3   | 0/0   |
|            | 2 days | 0/13                                    | 7/85 | 1/4   | 0/3   | 0/0   |
| 3          | 1 day  | 0/8                                     | 1/7  | 5/48  | 1/6   | 1/3   |
|            | 2 days | 0/4                                     | 1/5  | 11/53 | 2/8   | 0/1   |
| 4          | 1 day  | 0/0                                     | 1/5  | 3/14  | 17/39 | 3/14  |
|            | 2 days | 0/0                                     | 0/3  | 1/16  | 19/42 | 4/6   |
| 5          | 1 day  | 0/0                                     | 0/2  | 4/3   | 5/15  | 60/60 |
|            | 2 days | 0/0                                     | 0/1  | 1/3   | 2/11  | 60/70 |
